# Supplementary material for: La2O3 hollow nanospheres for high performance lithium-ion rechargeable batteries
Source: Royal Society of Chemistry journal article supplement (doi:10.1039/c2cc16085d), 2012-01-01
Supplement: c2cc16085d.pdf [file c2cc16085d.pdf]

## Electronic Supporting Information

### **Novel La<sub>2</sub>O<sub>3</sub> hollow nanospheres for high performance lithium-ion rechargeable batteries**

#### **Experimental Section**

Polymeric micelles solution was prepared by dissolving the required amount of the polymer in distilled water and then transferred to a volumetric flask to obtain a stock solution with a concentration of 0.5 gL<sup>-1</sup>. The micelle solution was adjusted to pH 9 by using dilute NaOH. The micelle solution (10 mL) was stirred for a few minutes followed by addition of desired amounts of LaCl<sub>3</sub>·7H<sub>2</sub>O (LaCl<sub>3</sub>/PAA = 5 to 12) under vigorous stirring. Then La<sup>3+</sup> was precipitated as La(OH)<sub>3</sub> by further increasing the pH to about 11. The composite particles were aged for 4 days without agitation and repeatedly washed with hot distilled water and ethanol and then dried at 60 °C. In order to remove the polymeric template as well as to crystallize the La<sub>2</sub>O<sub>3</sub> hollow particles, the composite particles were heated to 550 °C for 4 h in a muffle furnace under air.

For lithium ion alloying/de-alloying studies, 5.0 mg of the hollow La<sub>2</sub>O<sub>3</sub> was mixed well with 5.0 mg of teflonized acetylene black (TAB-2,) and then the mixture was pressed on a stainless steel mesh as the current collector under a pressure of 500 kg/cm<sup>2</sup> and dried at 160 °C for 5 hours under vacuum. The electrochemical characterizations were carried out using CR-2032 coin type cells with lithium as anode. The electrolyte used was 1M LiPF<sub>6</sub>-EC:DMC (1:2 by volume, Ube Chemicals Co. Ltd.). The coin cell assembling was performed in a glove box filled with argon (dew point, lower than -80 °C). The galvanostatic charge-discharge tests of the coin cell were performed at the constant current density 300 mA.g<sup>-1</sup>. For the cyclic voltammograms 2.0 mg of La<sub>2</sub>O<sub>3</sub> was mixed with 2.0 mg of TAB-2. Lithium foils were used as reference and counter electrodes. Scan rate is 20 mV/min in the range of 0.005 - 3.0 V vs Li/Li<sup>+</sup>.

Characterization: Powder X-ray diffraction (SXRD) patterns were collected on a Rigaku Rint-ultima diffractometer with CuK $\alpha$  radiation (40 kV, 20 mA) from 0.7° to 5° 2 $\theta$  in 0.01 steps at a scan

speed of  $1^{\circ} \text{ min}^{-1}$  and wide-angle XRD was performed on a Shimadzu XRD-7000 (WXRD) diffractometer.  $\text{N}_2$  adsorption/desorption analyses were carried out by using a Quantochrome (Autosorp 1C) apparatus. DLS measurements were carried out with an Otsuka ELS-8000 electrophoretic light scattering spectrophotometer. The TEM pictures were recorded on JEOL JEM-1210 (80 kV) and JEM-2100 (200 kV) electron microscopes. Fourier-transform infrared (FTIR) spectra were recorded on a Jasco FT/IR 7300 spectrometer. Thermogravimetry and differential thermal analysis (TG-DTA) were obtained with a MAC Science TG-DTA 2100 instrument under air. Galvanostatic charge-discharge measurements were performed on a BTS 2004 equipment, Nagano charge/discharge instrument. CV measurements were performed using an HSV-100 apparatus (Hokuto Denko Ltd., Japan).

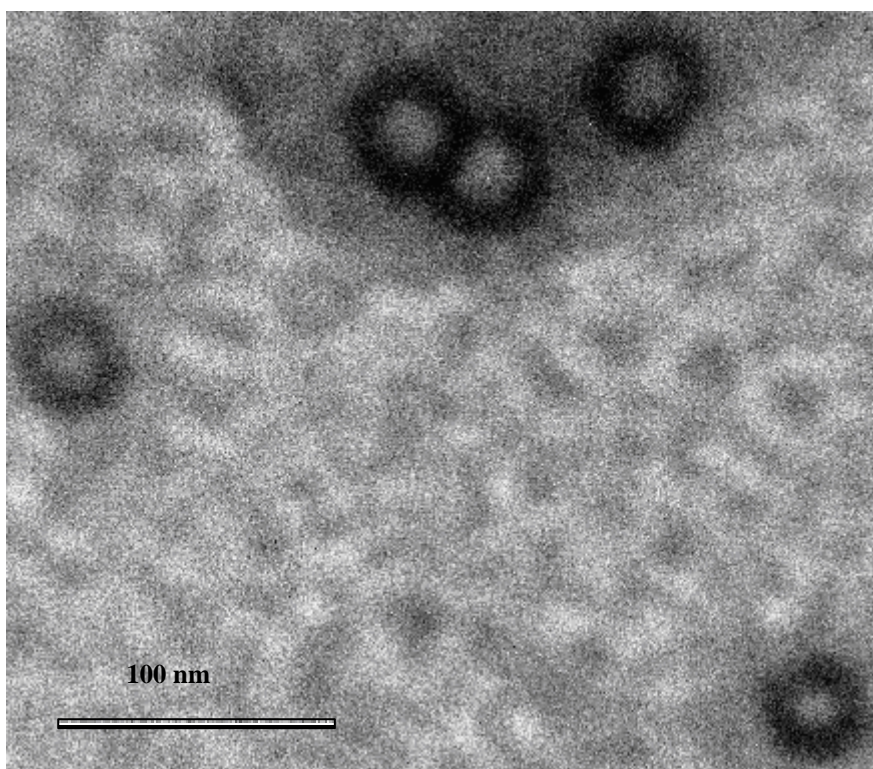

**Fig. S1.** TEM image of the micelles of PS-PAA-PEO stained with phosphotungstic acid.

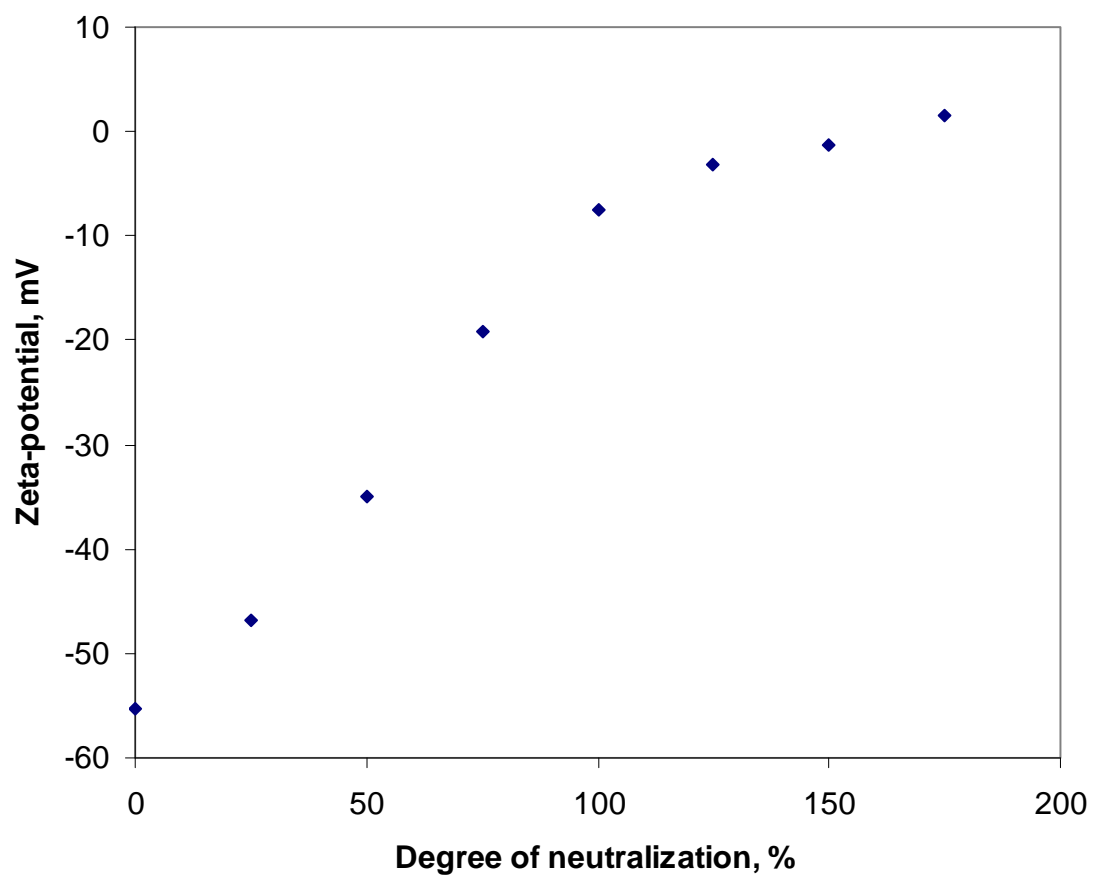

**Fig. S2.** Variation of zeta-potential due to charge neutralization of polyacrylic acid ( $\text{COO}^-$ ) with  $\text{La}^{3+}$  ions.

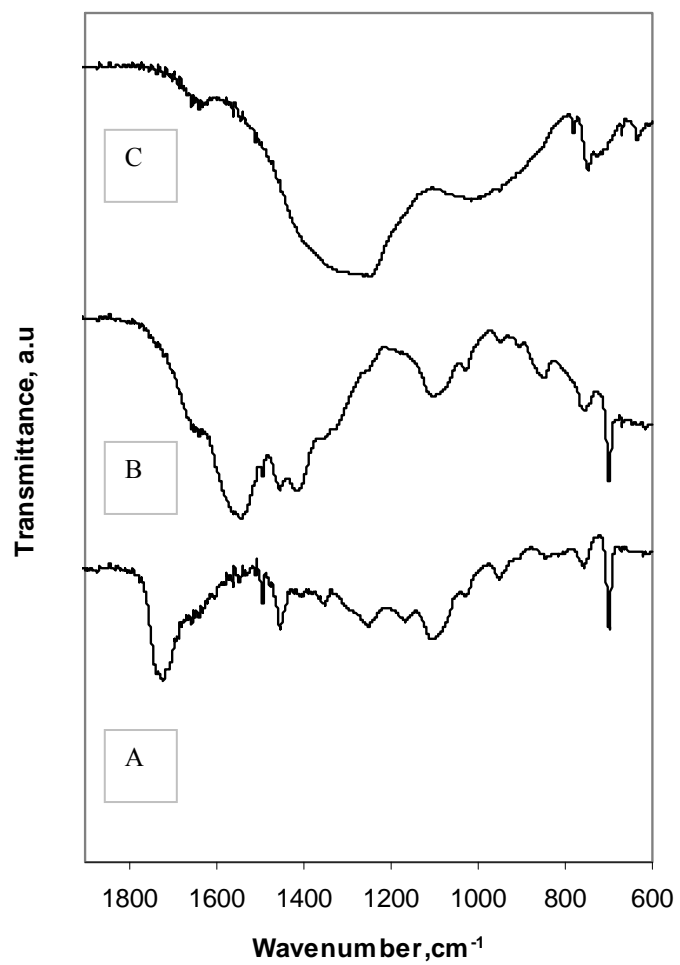

**Fig. S3.** FTIR spectra of: (A) PS-PAA-PEO, (B) PS-PAA-PEO + La<sup>3+</sup>, and (C) La<sub>2</sub>O<sub>3</sub> hollow nanosphere.

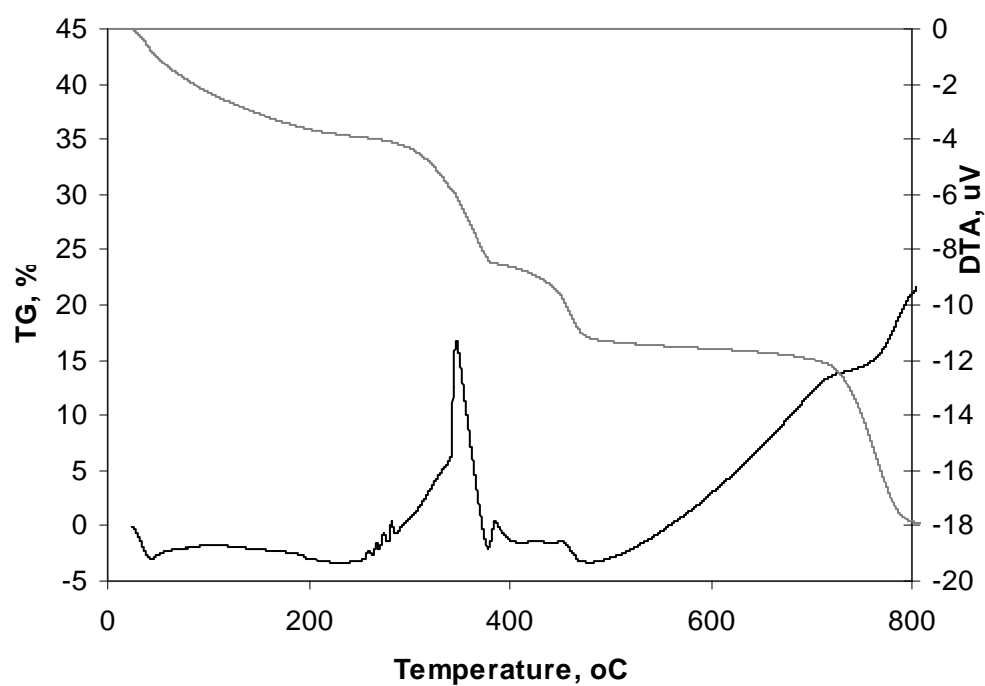

**Fig. S4.** TG/DTA curves of PS-PAA-PEO/La<sub>2</sub>O<sub>3</sub> composite particles

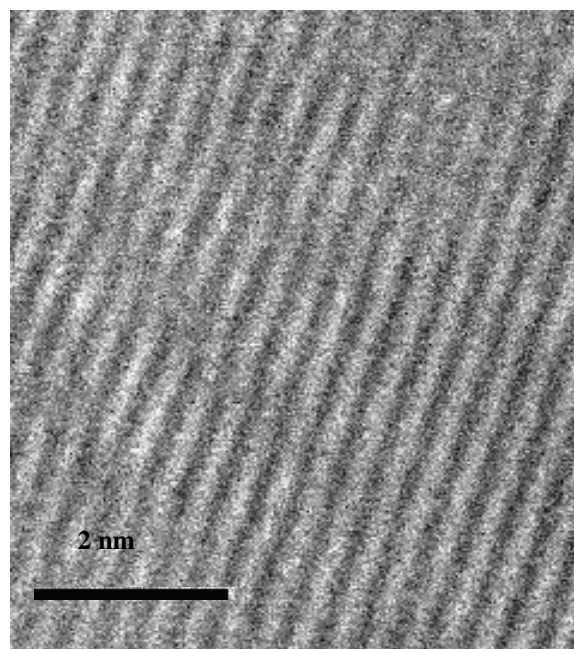

**Fig. S5.** High-resolution TEM of sample B.

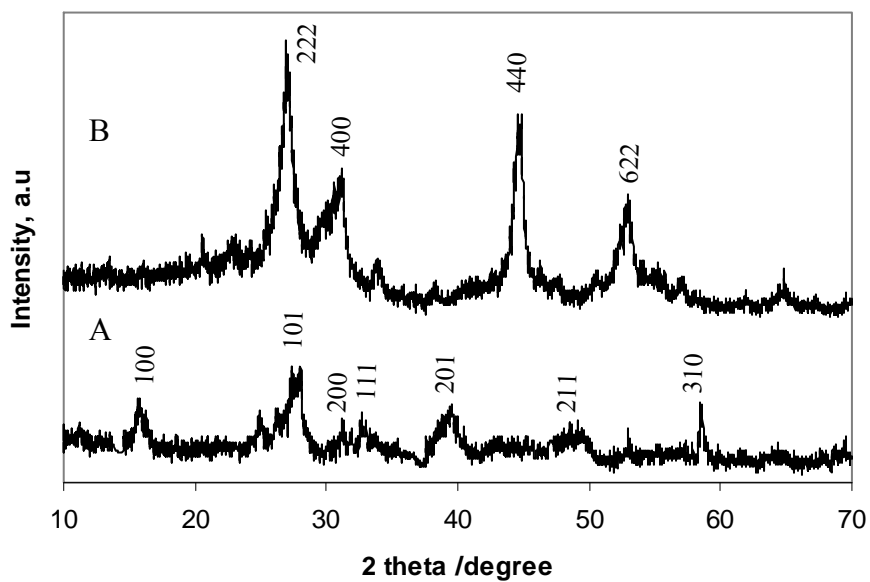

**Fig. S6.** XRD patterns of: (A) dried composite particles ( $\text{La}(\text{OH})_3$ ) and (B) calcined  $\text{La}_2\text{O}_3$  hollow nanospheres.



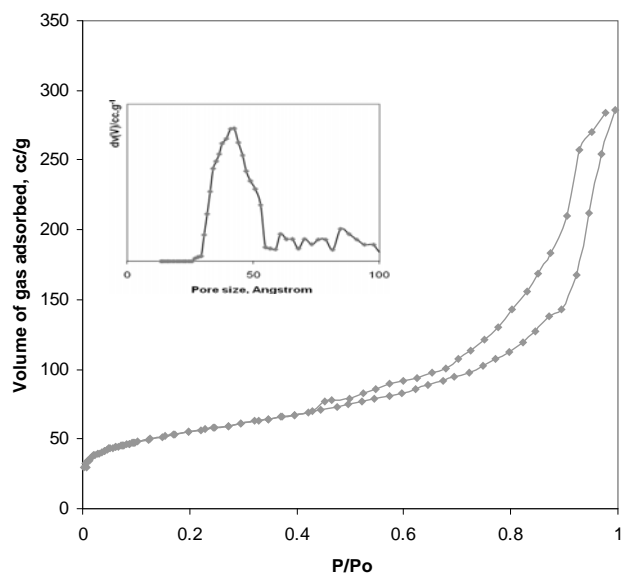

**Figure S7.** Nitrogen adsorption/desorption isotherms of La<sub>2</sub>O<sub>3</sub> (La:PAA = 8); Inset figure represents BJH pore-size distribution curve.

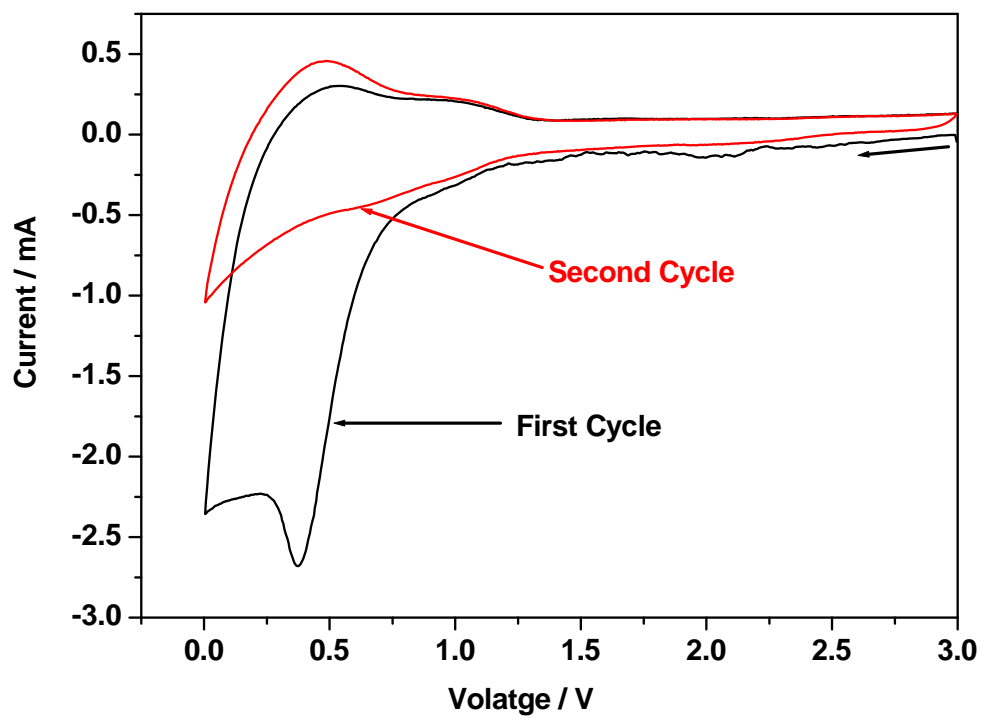

**Fig. S8:** Cyclic voltammogram of hollow  $\text{La}_2\text{O}_3$  nanospheres at a 20mV/min sweep rates in the range of 0.005-3.0 V. Reference and counter electrodes are lithium foils.
